1 **Neglecting low season nest protection exacerbates female biased sea turtle hatchling**  
2 **production through the loss of male producing nests.**

3

4

5 *Catherine E. Hart<sup>a,b\*</sup>, Luis Angel Tello-Sahagun<sup>c</sup>, F. Alberto Abreu-Grobois<sup>d</sup>, Alan A. Zavala-*  
6 *Norzagaray<sup>c,a,b</sup>, Marc Girondot<sup>f</sup>, Cesar P. Ley-Quíñonez<sup>c,a,b</sup>*

7

8 *<sup>a</sup>Grupo Tortuguero de las Californias A.C., La Paz, Baja California Sur, Mexico. E-mail:*

9 *cehart03@gmail.com*

10 *<sup>b</sup>Investigación, Capacitación y Soluciones Ambientas y Sociales A.C. Tepic, Nayarit, Mexico.*

11 *<sup>c</sup>Instituto Politécnico Nacional, CIIDIR Unidad Sinaloa, Juan de Dios Bátiz Paredes No. 250,*  
12 *Col. San Joachin, C.P. 81101, Guasave, Sinaloa, Mexico.*

13 *<sup>d</sup>Laboratorio de Genética, Unidad Académica Mazatlán, Instituto de Ciencias del Mar y*  
14 *Limnología, Universidad Nacional Autónoma de México, Mazatlán, Sinaloa C.P. 82000, Mexico*

15 *<sup>e</sup>Laboratoire Écologie, Systématique et Évolution, Faculté des Sciences d'Orsay, Université*  
16 *Paris-Sud, 91405 Orsay, France*

17

18 *\*Corresponding author*

19

20 **Abstract**

21

22 In the eastern Pacific, peak olive ridley sea turtle (*Lepidochelys olivacea*) nesting occurs  
23 during the warmest months which coincide with the rainy season, yet as nesting takes  
24 place year-round, the small proportion of the nests laid during dry-low season are exposed  
25 to contrasting environmental conditions. Most of the studies on Pacific coast sea turtles  
26 have estimated sex ratios produced during the rainy-high season when the majority of  
27 conservation activities take place. Thus, dry-low season nests have on the whole been  
28 overlooked. Here we compared sex ratios and hatchling fitness for offspring produced  
29 during the dry and rainy seasons during 2015. We found that protected olive ridley  
30 clutches incubated during the dry-low season were exposed to lower temperatures, yielded

31 higher hatchling success, produced 100% male offspring and larger, heavier hatchlings  
32 with better locomotor abilities. Our results highlight the critical value of monitoring and  
33 protecting sea turtle nests beyond the peak season (when nests can be protected more  
34 efficiently) to include low season nests, albeit at much lower densities, but which by  
35 yielding higher proportions of males and with greater locomotor capacities may be the key  
36 to population viability and adaptation to anthropogenic climate change.

37

## 38 **1. Introduction**

39

40 Reproductive seasonality is present across species and phyla. Even in tropical regions  
41 where climatic variations may be less apparent, species maintain some level of seasonal  
42 pattern. In marine species, reproductive seasonality may be linked to marine productivity  
43 (Afán et al. 2015), local environmental features and large-scale environmental cues.

44

45 In the eastern Pacific, peak olive ridley sea turtle (*Lepidochelys olivacea*) nesting occurs  
46 during the warmest months which coincides with the rainy season. However, nesting can  
47 and does take place year-round, exposing the comparatively small number of nests laid in  
48 the dry and cold months to environmental conditions that contrast with those of the  
49 majority of nests incubating during the summer. For example, incubation temperature and  
50 humidity are markedly different between peak and low season. Temperature is one of the  
51 critical factors for the successful embryonic development of sea turtles (Miller 1985), in  
52 part because these species exhibit temperature-dependent sex determination (Mrosovsky  
53 and Pieau 1991; Broderick et al. 2000; Charruau and Hénaut 2012). Turtle embryos can  
54 develop a thermal tolerance range of between 25°C and 35°C (Howard, Bell, and Pike  
55 2014). However, olive ridley clutches can survive higher temperatures (>37.9°C) but only  
56 over short durations but with detrimental effects on overall emergence success (Maulany,  
57 Booth, and Baxter 2012). Olive ridley turtles also present latitudinal variation in reported  
58 pivotal temperatures which produce 50 per cent of each sex within a clutch (Costa Rica:  
59 31°C (Wibbels, Rostal, and Byles 1998); Mexico: 29.9°C (Sandoval, Gómez-Muñoz, and  
60 Porta-Gándara 2017). As incubation temperature rises above the pivotal within a sea turtle

61 clutch, the proportion of females increases to a point of producing all females. The opposite  
62 is true as temperature falls below the pivotal and all-male production can occur in the  
63 lower viable temperature scale. Additionally, rainfall is a factor that varies greatly between  
64 seasons, especially in the tropics. Humidity within the nest environment influences  
65 moisture uptake by embryos, resulting in longer incubation durations and larger hatchlings  
66 (Delmas et al. 2007) and may also affect the sex ratio (Godfrey, Barreto, and Mrosovsky  
67 1996; Wyneken and Lolavar 2015).

68  
69 These factors make sea turtles particularly vulnerable to climate change (Fuller et al. 2013;  
70 Refsnider and Janzen 2016) which is predicted to not only cause increased incubation  
71 temperatures but also in sea level (IPCC 2007). Additionally, storms which are expected to  
72 become stronger and more frequent will further impact and modify turtle nesting habitat  
73 (L. Hawkes et al. 2009; L. A. Hawkes et al. 2013; Fuentes, Hamann, and Limpus 2010;  
74 Fuentes, Limpus, and Hamann 2011). Nonetheless, a female turtle can influence  
75 reproductive success through the choice of nesting location and depth at which she lays her  
76 eggs (David T. Booth and Freeman 2006; Santidrián Tomillo et al. 2017). However, even  
77 with the existence of female plasticity, sea turtles may have difficulty adapting to rapid  
78 climate change (L. Hawkes et al. 2009; Tilley et al. 2019). Olive ridleys may be the most  
79 adept of sea turtles to cope with environmental change due to their multiple reproductive  
80 strategies and observed flexibility in their degree of nesting site fidelity (Tripathy and  
81 Pandav 2007) and therefore may be able to choose sites that are less impacted by  
82 environmental change and which result in healthy offspring.

83  
84 In recent years, phenotypical variation has been used to study the way changes in abiotic  
85 conditions affect hatchling fitness (Fisher, Godfrey, and Owens 2014; Liles et al. 2019). In  
86 warmer nests, hatchlings hatch sooner and consequently are smaller as less yolk is  
87 converted into tissue. Smaller hatchlings are slower during the crawl towards the ocean  
88 and during initial displacement from coastal zones (David T. Booth and Evans 2011) when  
89 compared with their larger counterparts. Larger hatchlings have the advantage of being too  
90 large a prey for certain predators. Furthermore, hatchlings must be able to maintain a 24-  
91 72 hour frenzied swimming period upon entering the ocean. Larger hatchlings which are

92 stronger swimmers than smaller individuals could be more capable of avoiding the large  
93 aggregations of predators offshore of the nesting beach. Turtles in poor condition upon  
94 hatching have a reduced probability of avoiding predation (D. T. Booth et al. 2004;  
95 Wyneken and Salmon 1992; D. T. Booth 2009). The phenotype has also been used to  
96 evaluate the practice of nest relocation to hatcheries (Liles et al. 2019).

97

98 Since Mexico's 1990 ban on sea turtle use and consumption, multiple nesting beach  
99 conservation programs have been created to protect clutches from illegal take and  
100 predation. However, due to limited resources, many sea turtle conservation projects are  
101 not able to continually monitor nesting beaches year-round. For species such as the olive  
102 ridley that nest along the Mexican Pacific, limits in resources forces conservation programs  
103 to focus on the rainy season months when nesting is significantly higher (García, Ceballos,  
104 and Adaya 2003), leaving nests laid during the dry season without protection. Dry season  
105 nests are often not monitored or counted leading to an impression from regional reports  
106 that nesting does not occur or is insignificant during this period. Registering dry season  
107 nesting is extremely important as their different abiotic conditions may affect hatchling sex  
108 ratio, phenotype, and fitness. Also, as sea turtle nesting seasons have been shown to shift in  
109 response to changes in temperatures (Weishampel et al. 2004; Pike et al. 2006; Witt et al.  
110 2010), corresponding changes in phenology may be an adaptive strategy used by nesting  
111 turtles as a response to temperature increases due to climate change.

112

113 Nesting at Majahuas beach is part of the Playón de Mismaloya rookery which is notable for  
114 being the only known *arribada* rookery to collapse in the late 1970s due to high harvests of  
115 nesting females. The rookeries collapse resulted from a 99% reduction in nesting females  
116 (Abreu-Grobois and Plotkin 2008), which also resulted in the loss of genetic diversity  
117 (Rodríguez-Zárate, Rocha-Olivares, and Beheregaray 2013). Despite conservation efforts,  
118 there has been no *arribada* since the collapse. That said, solitary olive ridley nesting  
119 density is high in the area (García, Ceballos, and Adaya 2003).

120

121 Our goals were to 1) monitor nesting during a 12-month period; 2) compare incubation  
122 temperatures for nests incubated during the dry and rainy season; 3) determine if hatching

123 success varied between these two seasons; 4) estimate sex ratios produced in monitored  
124 nests; 5) determine if incubation season had an effect on hatchling fitness and phenotypes;  
125 and, 6) discuss the conservation implications of the results.

126

## 127 **2. Materials and methods**

### 128 ***2.1 Study site***

129 Majahuas beach is located in Jalisco between 19°50'41"N 105°22'40"W and 19°46'14"N  
130 105°19'38"W on the Pacific coast of Mexico. Majahuas is southernmost 11 km of the Playón  
131 de Mismaloya sea turtle sanctuary. A RAMSAR mangrove wetland backs the beach.

132

133 The dry season lasts up to 8 months from November to June with a rainy season between  
134 July to October. Mean annual rainfall varies between 748 to 1000 mm with a mean  
135 temperature of 25°C (Bullock 1986).

136

### 137 ***2.2 Nest collection and incubation***

138

139 We analyzed data collected by the fishing cooperative Roca Negra recorded during beach  
140 monitoring activities in 2015. Nests were protected via relocation to a hatchery (see  
141 below). We selected 71 nests at random (dry season: N = 37; rainy season: N = 34) for  
142 monitoring of incubation temperature and hatching success. Of these nests, 38 hatched and  
143 we conducted fitness tests on the hatchlings from these nests (dry season: N=28 nests;  
144 rainy season: N=10 nests).

145

146 Nests were collected during nightly beach patrols by either locating the recently laid nest  
147 via tracks or by encountering the nesting turtle. On encountering a female, we waited until  
148 she entered a trance-like state before taking morphometric measurements. Curved  
149 carapace length (CCL) and curved carapace width (CCW) were taken using a metric tape  
150 marked in 0.1 cm intervals. CCL was defined as the distance measured between the nuchal

151 scute and the outer border of the post-central scutes and CCW was taken from the widest  
152 part of the carapace with the tape following the curvature of the carapace.

153

154 On locating a nest, the eggs were carefully removed from the egg chamber and counted.  
155 Nest depth was measured by placing a pole across the top of the mouth of the nest and the  
156 distance as taken from the pole to the bottom of the nest chamber. For each nest, we  
157 recorded the beach section and zone where it was laid (Intertidal (beach face to the berm)  
158 = A, Open beach (the berm to the vegetation line) = B and Beach (vegetation line to the  
159 dune) = C). Eggs were transferred to a plastic bag and transported to the hatchery using a  
160 quad bike located at km 2 of Majahuas beach. Each nest was reconstructed using a manual  
161 tree planter to achieve a standardized depth of 45cm and then the nest chamber was  
162 formed by hand to imitate the shape of a natural nest made by a female turtle. Eggs were  
163 transferred into the artificially dug chamber and a temperature logger (HOBO UA-001-08,  
164 Onset USA) was placed in the center of each clutch before being covered with sand.  
165 Temperature loggers measured 5.8 x 3.3 x 2.3 cm and were programed to measure the  
166 hourly temperature (accuracy of  $\pm 0.5^{\circ}\text{C}$ ). Meteorological observations (daily maximum,  
167 minimum and mean air temperature) were obtained from the Universidad Autonoma de  
168 Mexico's Biological Research Center in Cuixmala, Jalisco from 1 January 2015 to 31  
169 December 2015.

170

### 171 ***2.3 Hatchling phenotype and fitness***

172

173 We selected 20 hatchlings at random upon emergence to partake in fitness tests and for  
174 phenotype measurements. When hatching success was too low to provide a total of 20  
175 hatchlings, we conducted phenotype and fitness tests on those that were available.  
176 Hatchlings were weighed using an electronic balance ( $\pm 0.1$  g) and their straight carapace  
177 length (SCL), straight carapace width (SCW) and carapace depth were measured using an  
178 electronic calliper ( $\pm 0.1$  mm). Crawling speed ( $\text{cm s}^{-1}$ ) was recorded by measuring the time  
179 taken by each hatchling to crawl along a raceway of 3 m, 100 mm wide dug into the  
180 hatchery's sand. We assigned hatchlings that failed to move within 300 s of being placed on  
181 the raceway to a failed to crawl category. We installed a LED light at one end of the raceway

182 and care was taken to ensure that the track was flat. The time taken for hatchlings to self-  
183 right themselves was measured by placing the turtle upside down on their carapace and  
184 taking the time it took to right itself. This was repeated six times for each hatchling. If an  
185 individual took more than 60 s for any righting attempt, they were given a 5 s rest period  
186 on their plastron before the next attempt. After the tests, hatchlings were returned to the  
187 container with their siblings and then released into the ocean.

188

#### 189 **2.4 Sex ratio estimation**

190

191 We used the R package *embryogrowth* v.6.4 (Girondot and Kaska 2014) to account for the  
192 effects of varying field temperatures on the dynamics of embryonic development and  
193 correctly identify the dates of the thermal sensitive period (TSP) when gonad  
194 differentiation occurred. With this, mean incubation temperatures during the true TSP  
195 were estimated for each nest and sex ratios derived using the thermal reaction norm for  
196 the species (Abreu-Grobois et al., in review). Sex ratio estimates are presented as mean  $\pm$   
197 SD unless stated otherwise.

#### 198 **2.4 Statistical analysis**

199 Reported statistics are arithmetic means  $\pm$  standard deviation (SD). All statistical were  
200 analyzed using Minitab® 18.1. (Minitab Inc., State College, Pennsylvania, USA).  
201 Kolmogorov-Sminov test was used as a normality test. Statistical test ANOVA with Tuckey's  
202 method were carried out to examine mean differences among neonate fitness data  
203 obtained. A simple linear regression model for correlating the size of the adult females with  
204 number of eggs, and the incubation temperature with effect hatchling morphology. The *p*  
205 values of  $\leq 0.05$  were used to determine significant differences.

#### 206 **2.5 Ethics Statement**

207 Permits were granted in Mexico by Dirección General de Vida Silvestre/Secretaría para el  
208 Medio Ambiente y los Recursos Naturales (SEMARNAT). Field Permits:  
209 SGPA/DGVS/05366/15.

210

## 211 **3. Results**

212

### 213 **3.1 Nesting**

214

215 We registered a total of 1954 nests over 12 months (1<sup>st</sup> January 2015 - 30<sup>th</sup> December  
216 2015). Nesting occurred year-round with highest levels registered in October when the  
217 conservation project relocated 605 nests to the beach hatchery and lowest levels in May  
218 (n= 22 nests) (Fig. 1a). The majority of nests (n = 1573, 80.5%) were laid in rainy season  
219 while 19.5% of nests (n = 381) occurred during the dry season. Nesting was predominately  
220 on beach berm or zone B where 79.3% of nests were laid (n = 1547 nests) (zone A: 7.3%,  
221 143 nests; zone C: 13.4%, 261 nests). Proportionally a greater number of nests were laid in  
222 intertidal zone C during the dry season (9.0% n=34 nests) than during the rainy season  
223 (6.9% n = 109). We measured 25 nesting females and found that the mean curved carapace  
224 length (CCL) and width (CCW) was 67.6 cm (range: 63–76 cm) and 73.8 cm (range: 68–82  
225 cm), respectively (Supplementary table 1). There was no significant relationship between  
226 the size of the adult females and number of eggs laid ( $R^2=0.26$ ;  $p=0.36$ ) or size of hatchlings.

227

### 228 **3.2 Nest Temperature**

229

230 Nest temperatures presented significant seasonal differences ( $F_{(1,69)}=143.26$ ;  $p<0.001$ ) with  
231 those incubated during the dry season ( $29.09^{\circ}\text{C} \pm 0.52$ ) being an mean of  $3.89^{\circ}\text{C}$  cooler  
232 than those incubated in the rainy season ( $32.98^{\circ}\text{C} \pm 0.58$ ). Temperature within the 71 nests  
233 (Table 1) ranged between  $22.8^{\circ}\text{C}$  and  $37.8^{\circ}\text{C}$ . The most frequent temperature interval for  
234 dry season nests was  $27\text{-}28^{\circ}\text{C}$  with 24% of recorded values, while in the rainy season, the  
235 most frequent temperature interval was  $33\text{-}34^{\circ}\text{C}$  with 28% of records (fig. 1b).

236

237 Within the hatchery, mid-nest depth temperature was lower than atmospheric  
238 temperature with tropical storms and hurricanes causing a visible drop in temperature  
239 (Supplemental fig. 1). However, mean incubation temperature within nests was not found  
240 to effect hatchling morphology (SCL ( $R^2=0.32964$ ), SCW ( $R^2=0.05564$ ), carapace depth



241 ( $R^2=0.32831$ ), weight ( $R^2=0.06795$ ) or locomotor ability (righting propensity ( $R^2=0.01263$ )  
242 righting time ( $R^2=0.01982$ ) or run speed ( $R^2=0.01415$ )).

243

### 244 **3.3 Sex ratio**

245

246 We monitored the temperature inside 71 nests but were only able to estimate sex ratios in  
247 57 due to 14 nests failing to hatch. All nests incubated in the dry season produced 100%  
248 male hatchlings, whereas those incubated during the rainy season (hatched nests:  $n=31$ )  
249 were female-biased with all but two nests producing 100% female offspring (Table 1).

250

### 251 **3.4 Hatchling morphology and locomotor performance**

252

253 Hatchling morphology was significantly affected by season, with dry season hatchlings  
254 presenting both larger SCL, (*Dry*: 40.62 mm  $\pm$  1.82; *Rainy*: 40.15 mm  $\pm$  2.53;  $F_{(1,758)}=7.16$ ;  
255  $p=0.008$ ) SCW (*Dry*: 32.84 mm  $\pm$  1.714 ; *Rainy*: 32.12 mm  $\pm$  2.104;  $F_{(1,758)}=20.71$ ;  $p<0.001$ )  
256 weight (*Dry*: 16.23g  $\pm$  1.686; *Rainy*: 14.93g  $\pm$  2.317;  $F_{(1,758)}=64.55$ ;  $p<0.001$ ) than those  
257 hatched in rainy season. Significant differences in terrestrial locomotor performance were  
258 observed between seasons ( $F_{(1,758)}=60.17$ ;  $p<0.001$ ), with dry season hatchlings having  
259 faster mean crawl speed (0.97 cm s<sup>-1</sup>  $\pm$  0.594) than those hatched in the rainy season (0.55  
260 cm s<sup>-1</sup>  $\pm$  0.359). Rainy season hatchlings also presented slower mean righting response (3.33  
261 s  $\pm$  2.11) than those hatched in the dry season (3.87 s  $\pm$  2.41) (Table 2). Overall hatching  
262 success was 52.7% and presented a significant difference between dry season hatchling  
263 success 74.3% and rainy season hatchling success 24.2% ( $F_{(1,1952)}=38.08$ ;  $p<0.001$ ). Data for  
264 each nest studied can be found in Supplementary table 2.

265

## 266 **4. Discussion**

267

268

### 269 **Hatchling fitness**

270

271 Seasonal effects were present in our study with dry season hatchlings having superior  
272 locomotor abilities and larger body size and weight than their rainy season counterparts.  
273 This is similar to other studies which have looked at the effect of nest temperature finding  
274 that cooler nests produce larger hatchlings (Booth, Freeney & Shibata 2013; Maulny et al  
275 2013; Wood et al 2014) that may be better equipped (larger carapaces and flippers) to  
276 crawl and swim faster than their smaller counterparts from warmer nests (Ischer et al  
277 2009). The phenotype and fitness advantages received from cooler incubation  
278 temperatures highlights the importance of protecting dry season nests which occur when  
279 nesting levels are low, as these nests produce have higher hatching success and the  
280 resulting hatchlings may have increased chance of survival as they may be quicker to exit  
281 predator rich coastal waters due to their larger size and better fitness characteristics.

282

283 Temperature is not the only factor that presents seasonal changes. Hatchlings entering the  
284 sea at different times of the year can encounter seasonal changes in oceanic circulation.  
285 Ocean currents can change in both intensity and direction. Therefore, neonates hatching at  
286 different times can end up in vastly different locations and be exposed to different  
287 conditions (Mansfield et al. 2017).

288

### 289 **Hurricane season**

290

291 Hurricane season runs from May 15th to November 30th in the Eastern North Pacific  
292 (NHC), coinciding with peak olive ridley sea turtle nesting activity. The 2015 storm season  
293 was particularly active with 22 storms registered for the east Pacific of which 13 were  
294 hurricanes, six were tropical storms and three were tropical depressions. Seven storms  
295 (Supplementary Fig 1) affected Majahuas nesting beach during this study. This resulted in  
296 the loss of hundreds of nests due to beach erosion and wash-out of hatcheries. However,  
297 these storms also have the effect of lowering incubation temperatures, which help lower  
298 sand temperature in some cases below pivotal temperature. During August and much of  
299 September sand temperature remained above 34°C which has been identified as the lethal  
300 superior incubation temperature for some olive ridley populations. For example, when the  
301 effects of Hurricane Kevin and Linda occurred within the same week a fall in mid-nest

302 depth temperature of 3°C (35°C to 32°C) occurred taking incubation temperatures out of  
303 lethal limits.

304

### 305 **Sex ratio**

306

307 Dry season nests were estimated to be produce entirely male hatchlings, the increased  
308 hatch rate and survival of males may help balance out female biased sex ratios at Majahuas  
309 beach. Sandoval Espinoza (2012) estimated sex ratios for olive ridleys along the Mexican  
310 Pacific coast and found that ratios varied greatly with beaches in Jalisco (Chalacatepec and  
311 Playon de Mismaloya) producing 23% male sex ratios. For the Mexican Pacific, they  
312 estimated that temperatures would have resulted in male hatchling throughout the study  
313 period (July-Dec 2010) with 31% of males in September, 11% in August, 17% in October,  
314 20% in November and 19% in December. They did not monitor temperatures in dry  
315 season. This is contrary to our results where the 2015 high rainy season temperatures  
316 resulted in very low levels of male hatchling production.

317

318 When we compare our results with those of a study in 1993 (Valadez González, Silva Bátiz,  
319 and Hernández Vázquez 2000) at a beach 5km north of Majahuas we find similar variations  
320 in sex ratio with 100% females produced in October and 100% males in December.  
321 However, the overall sex ratio of 7:3 in the 1993 in study is not the same as that found in  
322 Majahuas during our research. Incubation period in 1993 (Valadez González, Silva Bátiz,  
323 and Hernández Vázquez 2000) was 44 to 65 days, which is similar to our results where we  
324 recorded the longest incubation duration in February (64.2d) and the shortest in August  
325 (44.8d). However, temperature registered in the La Gloria beach hatchery ranged from  
326 27°C ±0.10 (December) to 34°C ±0.36 (August) even when considering a higher  
327 temperature within nests due to metabolic heat (Sandoval et al. 2011) the 1993 study nests  
328 would not have experienced the extreme superior temperatures (max 37.8°C) that we  
329 registered within clutches. As expected from our 12-month study period, we registered  
330 lower temperatures than in the La Gloria study which did not monitor temperature during  
331 the dry winter season. Although Valadez-González et al. (2000) only recorded the hatchery

332 sand temperature at 12-hour intervals at nest depth but not from within clutches, the study  
333 allows us to compare our results with data taken two decades ago.

334

### 335 **Benefits of low season nesting for females**

336

337 Olive ridleys have been found to present the highest levels of multiple paternity in clutches  
338 than in any other sea turtle species, this is especially prominent in *arribada* breeding  
339 populations with 92% of nests having two or more fathers which led to the hypothesis that  
340 population size has a dominant effect on multiple paternity (Jensen et al. 2006). Yet the  
341 benefits of polyandry to female sea turtles have not been identified and multiple paternity  
342 was found to result in smaller clutches in Green turtles (Wright et al. 2013). Females that  
343 nest in times of low abundance are likely to encounter fewer males and therefore, benefit  
344 by a lower chance of multiple encounters with aggressive males (Jensen et al. 2006).  
345 However, small solitary breeding populations have also been found to present high levels  
346 of multiple paternity (Duran et al. 2015) and this could be a result of the low breeding and  
347 feeding site fidelity (Plotkin 2010) as well as a result of sea turtle females' ability to store  
348 sperm for over a multiple years. During surveys in the Mexican Pacific in 2010, (Zepeda-  
349 Borja et al. 2017) observed olive ridleys mating only during October (autumn).

350

### 351 **Implications of current conservation effort**

352

353 Concentrating effort and money on the peak nesting season may seem the best use of  
354 limited funds however nests laid during peak nesting season have lower possibilities of  
355 hatching than those laid in the low season due to lethally high temperatures and beach  
356 erosion due to storms. When protected from predation in hatcheries, the comparatively  
357 small number of nests laid in low season have higher hatch rates and produce male  
358 hatchlings which are a rare occurrence during the high rainy season. Although in 2015 the  
359 number of nests laid during low season represented just 19.5% of overall nesting, these  
360 nests are of high conservation value as they produce the rarer sex and could help  
361 population viability. It is important to note that patrols between February and May 2015  
362 were limited due to mechanical problems with the projects quad bike on which patrols are

363 made of the 11 km beach. This resulted in shorter foot patrols during dry season and  
364 therefore nesting levels may have been higher than those reported here. Despite this, our  
365 study highlights the fact that viable nests are laid year-round and that these nests produce  
366 valuable male hatchlings. The majority of these nests are left on the beach and are predated  
367 by raccoons and coatis during the first night after laying.

368

## 369 **CONCLUSION**

370

371 Conservation projects that concentrate effort solely on peak sea turtle nesting season may  
372 be inadvertently favouring the production of female hatchlings and leaving male producing  
373 nests without protection from illegal take by humans as well as predation by animals.  
374 Although it may be tempting to concentrate limited funds to peak season, winter nests are  
375 of high value in areas such as Majahuas beach where summer nests do not produce male  
376 offspring and are subject to erosion due to tropical storms and hurricanes.

377

378 **Authors' contributions.** CEH conceived the study, participated in data collection and  
379 analysis and drafted the manuscript; CPLQ carried out the statistical analyses and  
380 participated in writing the manuscript; LATS and CEH collected field data; MG analysed the  
381 sex ratio data. All authors gave final approval for publication.

382

383 **Competing interests.** We declare we have no competing interests.

384

385 **Funding.** No funding has been received for this article. The article was self-funded by CEH.

386

## 387 **Acknowledgements.**

388 We are grateful for the support provided by personnel from the fishers' cooperative Boca  
389 Negra (Cooperativa Pesquera Roca Negra) during our time working on Majahuas beach.  
390 Jasiel Noé Juárez-Rábago.

391

392

393

394 **FIGURE LEGEND**

395  
 396 **Figure 1.** (a) Temporal distribution of nests protected at Majahuas beach during 2015 (b)  
 397 Temperature frequency registered in the centre of hatched clutches during incubation.  
 398

399 **TABLES**

400 **Table 1.** Results summary for data from 71 olive ridley clutches with ranges of incubation temperatures and  
 401 estimated sex ratios (as proportion of males).  
 402

| Field code | Season | Starting incubation date | Incubation duration (d) | Clutch size | Hatching success | %>34°C | %<26°C | Mean °C ±SD (range)    | Sex ratio |
|------------|--------|--------------------------|-------------------------|-------------|------------------|--------|--------|------------------------|-----------|
| MJ1        | Dry    | 18 Feb                   | 61.0                    | 79          | 0.22             | 0.0    | 4.6    | 28.3 ± 1.6 (23.2-31.2) | 1.0       |
| MJ2        | Dry    | 18 Feb                   | 60.1                    | 87          | 0.95             | 0.0    | 4.6    | 28.9 ± 2.1 (23.6-32.9) | 1.0       |
| MJ3        | Dry    | 18 Feb                   | 59.5                    | 100         | 0.62             | 0.0    | 4.5    | 28.9 ± 2.1 (23.7-32.9) | 1.0       |
| MJ4        | Dry    | 16 Feb                   | 62.0                    | 104         | 1.00             | 0.0    | 4.5    | 28.8 ± 2.3 (23.2-33.2) | 1.0       |
| MJ5        | Dry    | 16 Feb                   | 61.6                    | 93          | 0.85             | 0.0    | 5.5    | 28.5 ± 2.3 (23.3-33.0) | 1.0       |
| MJ6        | Dry    | 16 Feb                   | 60.4                    | 103         | 1.00             | 2.6    | 4.4    | 29.2 ± 2.5 (23.8-34.7) | 1.0       |
| MJ7        | Dry    | 16 Feb                   | 61.1                    | 85          | 0.94             | 0.0    | 4.4    | 29.0 ± 2.2 (23.8-33.3) | 1.0       |
| MJ8        | Dry    | 16 Feb                   | 60.3                    | 96          | 0.85             | 0.0    | 4.6    | 28.8 ± 2.4 (22.8-33.3) | 1.0       |
| MJ9        | Dry    | 16 Feb                   | 62.6                    | 77          | 0.13             | 0.0    | 6.3    | 27.8 ± 1.6 (23.1-30.5) | 1.0       |
| MJ10       | Dry    | 16 Feb                   | 59.9                    | 92          | 0.92             | 0.0    | 4.7    | 28.9 ± 2.1 (24.0-32.8) | 1.0       |
| MJ11       | Dry    | 19 Feb                   | 57.6                    | 157         | 0.90             | 1.8    | 5.2    | 29.1 ± 2.7 (23.4-34.3) | 1.0       |
| MJ13       | Dry    | 22 Feb                   | 62.5                    | 87          | 0.67             | 0.0    | 6.1    | 28.5 ± 1.9 (24.2-31.5) | 1.0       |
| MJ14       | Dry    | 24 Feb                   | 64.2                    | 74          | 0.50             | 0.0    | 7.9    | 28.2 ± 1.9 (23.0-31.1) | 1.0       |
| MJ15       | Dry    | 24 Feb                   | 59.1                    | 123         | 0.89             | 0.0    | 6.2    | 28.8 ± 2.5 (24.0-33.1) | 1.0       |
| MJ16       | Dry    | 25 Feb                   | 57.5                    | 94          | 0.80             | 0.0    | 5.9    | 28.8 ± 2.3 (23.1-32.9) | 1.0       |
| MJ17       | Dry    | 25 Feb                   | 57.5                    | 96          | 0.85             | 0.0    | 5.1    | 29.1 ± 2.3 (23.9-33.2) | 1.0       |
| MJ18       | Dry    | 25 Feb                   | 57.3                    | 84          | 0.61             | 0.7    | 4.8    | 29.2 ± 2.5 (24.2-34.6) | 1.0       |
| MJ19       | Dry    | 25 Feb                   | 60.8                    | 113         | 0.85             | 0.0    | 4.5    | 28.8 ± 1.9 (24.4-32.0) | 1.0       |
| MJ20       | Dry    | 25 Feb                   | 60.7                    | 97          | 0.93             | 0.0    | 4.8    | 29.3 ± 2.4 (23.9-33.2) | 1.0       |
| MJ21       | Dry    | 02 Mar                   | 58.1                    | 102         |                  | 0.0    | 6.3    | 29.0 ± 2.2 (23.6-32.4) | 1.0       |
| MJ22       | Dry    | 02 Mar                   | 58.2                    | 77          |                  | 0.0    | 8.3    | 28.6 ± 2.2 (23.4-32.1) | 1.0       |
| MJ24       | Dry    | 04 Mar                   | 63.5                    | 92          | 0.90             | 0.0    | 7.5    | 28.8 ± 2.1 (23.5-32.0) | 1.0       |
| MJ25       | Dry    | 04 Mar                   | 56.5                    | 112         | 0.97             | 0.0    | 6.5    | 29.3 ± 2.3 (23.4-32.9) | 1.0       |
| MJ26       | Dry    | 04 Mar                   | 56.5                    | 79          | 0.81             | 0.0    | 5.3    | 29.3 ± 2.1 (24.3-32.2) | 1.0       |
| MJ27       | Dry    | 04 Mar                   | 56.4                    | 112         | 0.89             | 0.0    | 5.0    | 29.6 ± 2.3 (24.3-33.2) | 1.0       |

|             |       |        |               |     |      |      |     |                           |     |
|-------------|-------|--------|---------------|-----|------|------|-----|---------------------------|-----|
| <b>MJ28</b> | Dry   | 04 Mar | 63.4          | 83  | 0.93 | 0.0  | 3.1 | 29.6 ± 1.9<br>(25.7-32.5) | 1.0 |
| <b>MJ30</b> | Dry   | 05 Mar | 62.5          | 78  | 0.62 | 0.0  | 5.9 | 28.9 ± 1.7<br>(24.3-31.3) | 1.0 |
| <b>MJ31</b> | Dry   | 19 Mar | 52.9          | 89  | 0.85 | 0.0  | 0.2 | 30.3 ± 1.6<br>(25.0-32.9) | 1.0 |
| <b>MJ32</b> | Dry   | 21 Mar | 54.9          | 106 | 0.92 | 0.0  | 0.0 | 29.8 ± 1.7<br>(26.3-32.8) | 1.0 |
| <b>MJ33</b> | Dry   | 21 Mar | 54.8          | 64  | 0.61 | 0.0  | 0.2 | 29.3 ± 1.3<br>(25.1-32.0) | 1.0 |
| <b>MJ34</b> | Dry   | 21 Mar | 54.8          | 103 | 0.95 | 0.0  | 0.2 | 30.0 ± 2.0<br>(25.5-33.3) | 1.0 |
| <b>MJ35</b> | Dry   | 21 Mar | 56.4          | 85  | 0.95 | 0.0  | 0.1 | 29.4 ± 1.8<br>(25.2-32.5) | 1.0 |
| <b>MJ36</b> | Dry   | 21 Mar | 57.8          | 128 | 0.86 | 3.2  | 0.3 | 29.7 ± 2.3<br>(25.1-36.4) | 1.0 |
| <b>MJ37</b> | Dry   | 21 Mar | 56.7          | 86  | 0.91 | 0.0  | 0.4 | 29.0 ± 1.9<br>(25.8-32.7) | 1.0 |
| <b>MJ38</b> | Dry   | 22 Mar | 57.7          | 86  |      | 0.0  | 0.4 | 29.0 ± 1.4<br>(25.0-31.9) | 1.0 |
| <b>MJ39</b> | Dry   | 22 Mar | 53.8          | 76  | 0.89 | 0.0  | 0.2 | 29.6 ± 1.7<br>(25.3-33.0) | 1.0 |
| <b>MJ40</b> | Dry   | 22 Mar | 51.0          | 107 | 0.93 | 0.0  | 0.1 | 30.1 ± 1.9<br>(25.3-33.4) | 1.0 |
| <b>MJ42</b> | Rainy | 02 Jun | 47.7          | 92  | 0.54 | 41.1 | 0.0 | 33.5 ± 1.6<br>(29.5-36.5) | 0.0 |
| <b>MJ43</b> | Rainy | 02 Jun | 47.7          | 81  |      | 5.2  | 0.0 | 32.2 ± 1.1<br>(30.0-34.2) | 0.0 |
| <b>MJ44</b> | Rainy | 02 Jun | 47.7          | 98  |      | 0.0  | 0.0 | 32.0 ± 1.0<br>(30.2-33.6) | 0.0 |
| <b>MJ45</b> | Rainy | 03 Jun | 47.7          | 123 | 0.60 | 0.1  | 0.0 | 32.0 ± 1.2<br>(29.0-34.1) | 0.0 |
| <b>MJ47</b> | Rainy | 10 Jun | 50.8          | 121 | 0.92 | 8.2  | 0.0 | 32.3 ± 1.3<br>(29.7-35.2) | 0.0 |
| <b>MJ48</b> | Rainy | 20 Jun | 46.5          | 90  |      | 50.1 | 0.0 | 33.6 ± 1.5<br>(28.2-35.6) | 0.0 |
| <b>MJ49</b> | Rainy | 20 Jun | 46.7          | 109 | 0.93 | 1.5  | 0.0 | 31.8 ± 1.2<br>(28.3-34.1) | 1.0 |
| <b>MJ50</b> | Rainy | 21 Jun | 46.5          | 97  | 0.88 | 50.9 | 0.0 | 33.7 ± 1.5<br>(28.5-35.9) | 0.0 |
| <b>MJ51</b> | Rainy | 26 Jun | 42            | 80  |      | 3.1  | 0.0 | 31.9 ± 1.3<br>(28.4-34.3) | 1.0 |
| <b>MJ52</b> | Rainy | 26 Jun | 52.6          | 103 |      | 53.9 | 0.0 | 33.7 ± 1.6<br>(27.8-36.6) | 0.0 |
| <b>MJ53</b> | Rainy | 02 Jul | 46.1          | 93  | 0.69 | 40.0 | 0.0 | 33.7 ± 1.9<br>(28.8-37.8) | 0.0 |
| <b>MJ55</b> | Rainy | 02 Jul | 46.7          | 91  | 0.41 | 16.0 | 0.0 | 32.7 ± 1.5<br>(28.3-34.9) | 0.0 |
| <b>MJ57</b> | Rainy | 05 Jul | 47.6          | 98  |      | 40.4 | 0.0 | 33.4 ± 2.0<br>(28.1-37.7) | 0.0 |
| <b>MJ59</b> | Rainy | 05 Jul | 49.7          | 106 |      | 11.4 | 0.0 | 32.6 ± 1.5<br>(27.9-35.1) | 0.0 |
| <b>MJ63</b> | Rainy | 14 Jul | 46.2          | 105 |      | 17.1 | 0.0 | 33.5 ± 0.7<br>(30.4-34.9) | 0.0 |
| <b>MJ67</b> | Rainy | 14 Jul | 59.6          | 109 | 0.25 | 0.0  | 0.0 | 32.0 ± 1.4<br>(27.4-34.0) | 0.0 |
| <b>MJ69</b> | Rainy | 14 Jul | 59.6          | 111 |      | 2.8  | 0.0 | 32.5 ± 1.4<br>(27.9-34.4) | 0.0 |
| <b>MJ71</b> | Rainy | 23 Aug | 47.9          | 100 |      | 27.5 | 0.0 | 33.1 ± 1.5<br>(29.0-35.9) | 0.0 |
| <b>MJ73</b> | Rainy | 24 Aug | 47.8          | 87  |      | 28.8 | 0.0 | 33.2 ± 1.5<br>(29.0-36.0) | 0.0 |
| <b>MJ74</b> | Rainy | 24 Aug | 47.8          | 86  | 0.69 | 28.2 | 0.0 | 33.1 ± 1.6<br>(28.9-36.2) | 0.0 |
| <b>MJ75</b> | Rainy | 24 Aug | 44.8          | 56  | 0.88 | 0.4  | 0.0 | 33.9 ± 0.7<br>(31.2-36.1) | 0.0 |
| <b>MJ77</b> | Rainy | 24 Aug | Did not hatch | 68  | 0.00 | 0.3  | 0.0 | 33.2 ± 1.5<br>(29.0-36.7) | NA  |

|              |       |        |               |     |      |     |     |                           |    |
|--------------|-------|--------|---------------|-----|------|-----|-----|---------------------------|----|
| <b>MJ78</b>  | Rainy | 24 Aug | Did not hatch | 117 | 0.00 | 0.2 | 0.0 | 33.0 ± 1.5<br>(28.8-36.0) | NA |
| <b>MJ79</b>  | Rainy | 24 Aug | Did not hatch | 120 | 0.00 | 0.3 | 0.0 | 33.2 ± 1.5<br>(29.2-36.0) | NA |
| <b>MJ98</b>  | Rainy | 25 Sep | Did not hatch | 93  | 0.00 | 0.3 | 0.0 | 33.2 ± 1.8<br>(28.8-36.2) | NA |
| <b>MJ99</b>  | Rainy | 25 Sep | Did not hatch | 66  | 0.00 | 0.4 | 0.0 | 33.3 ± 1.8<br>(28.6-36.3) | NA |
| <b>MJ100</b> | Rainy | 25 Sep | Did not hatch | 113 | 0.00 | 0.4 | 0.0 | 33.6 ± 2.0<br>(28.9-38.5) | NA |
| <b>MJ101</b> | Rainy | 25 Sep | Did not hatch | 87  | 0.00 | 0.3 | 0.0 | 33.1 ± 1.6<br>(29.1-35.9) | NA |
| <b>MJ103</b> | Rainy | 25 Sep | Did not hatch | 112 | 0.00 | 0.3 | 0.0 | 33.2 ± 1.5<br>(28.6-35.6) | NA |
| <b>MJ105</b> | Rainy | 25 Sep | Did not hatch | 92  | 0.00 | 0.2 | 0.0 | 32.8 ± 1.6<br>(28.3-35.3) | NA |
| <b>MJ106</b> | Rainy | 25 Sep | Did not hatch | 111 | 0.00 | 0.3 | 0.0 | 33.1 ± 1.7<br>(28.6-35.8) | NA |
| <b>MJ107</b> | Rainy | 25 Sep | Did not hatch | 98  | 0.00 | 0.3 | 0.0 | 33.2 ± 1.6<br>(28.9-35.8) | NA |
| <b>MJ108</b> | Rainy | 25 Sep | Did not hatch | 85  | 0.00 | 0.4 | 0.0 | 33.3 ± 1.7<br>(28.8-35.8) | NA |
| <b>MJ110</b> | Rainy | 25 Sep | Did not hatch | 93  | 0.00 | 0.4 | 0.0 | 33.5 ± 1.6<br>(29.5-36.0) | NA |

403  
404

**Table 2.** Mean temperature for 71 nests (37 in Dry season and 34 in Rainy season) and mean phenotype measurements (straight carapace length (SCL: mm), straight carapace width (SCW: mm) and weight (g)) and crawl speed and righting response for olive ridley sea turtle hatchlings from 38 nests at Majahuas beach by season (Rainy: n = 10; Dry: n = 28) in 2015.

| Parameter                         | Season               |                 |                      |                 | Statistical Test                    |
|-----------------------------------|----------------------|-----------------|----------------------|-----------------|-------------------------------------|
|                                   | Dry                  |                 | Rainy                |                 |                                     |
|                                   | Mean ± SD            | Min-Max         | Mean ± SD            | Min-Max         |                                     |
| Temperature (°C)                  | 24.94 ± 1.858<br>(a) | 22.80-<br>28.50 | 29.07 ± 0.807<br>(b) | 27.80-<br>32.00 | $F_{(1,69)}=143.26$ ;<br>$p<0.001$  |
| Hatching Success (%)              | 74.2 ± 2.97 (a)      | 0.000-<br>100.0 | 24.1 ± 3.56<br>(b)   | 0.00-92.70      | $F_{(1,1952)}=38.08$ ;<br>$p<0.001$ |
| SCL (mm)                          | 40.62 ± 1.823<br>(a) | 34.00-<br>47.50 | 40.15 ± 2.535<br>(b) | 30.00-<br>49.00 | $F_{(1,758)}=7.16$ ; $p=0.008$      |
| SCW (mm)                          | 32.84 ± 1.714<br>(a) | 26.40-<br>38.00 | 32.12 ± 2.104<br>(b) | 26.00-<br>29.50 | $F_{(1,758)}=20.71$ ;<br>$p<0.001$  |
| Weight (g)                        | 16.23 ± 1.686<br>(a) | 12.00-<br>24.00 | 14.93 ± 2.317<br>(b) | 8.020-<br>19.88 | $F_{(1,758)}=64.55$ ;<br>$p<0.001$  |
| Crawl Speed (cm s <sup>-1</sup> ) | 0.977 ± 0.594<br>(a) | 0.132-<br>3.600 | 0.550 ± 0.359<br>(b) | 0.086-<br>1.597 | $F_{(1,758)}=60.17$ ;<br>$p<0.001$  |
| Righting Response (s)             | 3.870 ± 2.412<br>(a) | 0.980-<br>19.00 | 3.336 ± 2.110<br>(b) | 0.830-<br>18.00 | $F_{(1,758)}=04.641$ ;<br>$p=0.032$ |
| Righting Propensity               | 4.471 ± 2.174<br>(a) | 0.000-<br>6.000 | 4.598 ± 2.139<br>(a) | 0.000-<br>6.000 | $F_{(1,758)}=0.352$ ;<br>$p=0.553$  |

N.B.: The statistical test used is the analysis of variance (ANOVA); statistical test data as mean ± SD followed by Tukey's test in parentheses if significant differences were found. Hatching success data in percentage.

405  
406  
407  
408  
409



410  
411  
412  
413  
414  
415  
416  
417  
418  
419  
420  
421  
422  
423  
424  
425  
426  
427  
428  
429  
430  
431  
432  
433  
434  
435  
436  
437  
438  
439  
440

## REFERENCES

- Abreu-Grobois, and Plotkin. 2008. '*Lepidochelys olivacea*'. The IUCN Red List of Threatened Species. <http://www.iucnredlist.org/details/11534/0>.
- Afán, Isabel, André Chiaradia, Manuela G. Forero, Peter Dann, and Francisco Ramírez. 2015. 'A Novel Spatio-Temporal Scale Based on Ocean Currents Unravels Environmental Drivers of Reproductive Timing in a Marine Predator'. *Proceedings of the Royal Society B: Biological Sciences* 282 (1810): 20150721. <https://doi.org/10.1098/rspb.2015.0721>.
- Booth, D. T. 2009. 'Swimming for Your Life: Locomotor Effort and Oxygen Consumption during the Green Turtle (*Chelonia Mydas*) Hatchling Frenzy'. *Journal of Experimental Biology* 212 (1): 50–55. <https://doi.org/10.1242/jeb.019778>.
- Booth, D. T., E Burgess, J McCosker, and JM Lanyon. 2004. 'The Influence of Incubation Temperature on Post-Hatching Fitness Characteristics of Turtles.' *International Congress Series* 1275: 226–33.
- Booth, David T., and Andrew Evans. 2011. 'Warm Water and Cool Nests Are Best. How Global Warming Might Influence Hatchling Green Turtle Swimming Performance'. Edited by Howard Browman. *PLoS ONE* 6 (8): e23162. <https://doi.org/10.1371/journal.pone.0023162>.
- Booth, David T., and Candida Freeman. 2006. 'Sand and Nest Temperatures and an Estimate of Hatchling Sex Ratio from the Heron Island Green Turtle (*Chelonia Mydas*) Rookery, Southern Great Barrier Reef'. *Coral Reefs* 25 (4): 629–33. <https://doi.org/10.1007/s00338-006-0135-4>.
- Broderick, A. C., B. J. Godley, S. Reece, and J. R. Downie. 2000. 'Incubation Periods and Sex Ratios of Green Turtles: Highly Female Biased Hatchling Production in the Eastern Mediterranean'. *Marine Ecology Progress Series* 202: 273–281.

- 441 Bullock, S. H. 1986. 'Climate of Chamela, Jalisco, and Trends in the South Coastal Region of  
442 Mexico'. *Archives for Meteorology, Geophysics, and Bioclimatology, Series B* 36 (3):  
443 297–316. <https://doi.org/10.1007/BF02263135>.
- 444 Charruau, Pierre, and Yann Hénaut. 2012. 'Nest Attendance and Hatchling Care in Wild  
445 American Crocodiles (*Crocodylus acutus*) in Quintana Roo, Mexico'. *Animal Biology*  
446 62 (1): 29–51. <https://doi.org/10.1163/157075511X597629>.
- 447 Delmas, Virginie, Emmanuelle Baudry, Marc Girondot, and ANNE-CAROLINE PREVOT-  
448 JULLIARD. 2007. 'The Righting Response as a Fitness Index in Freshwater Turtles'.  
449 *Biological Journal of the Linnean Society* 91 (1): 99–109.
- 450 Duran, N., S.G. Dunbar, R.A. Escobar, and T.G. Standish. 2015. 'High Frequency of Multiple  
451 Paternity in a Solitary Population of Olive Ridley Sea Turtles in Honduras'. *Journal of*  
452 *Experimental Marine Biology and Ecology* 463 (February): 63–71.  
453 <https://doi.org/10.1016/j.jembe.2014.10.023>.
- 454 Fisher, Leah R., Matthew H. Godfrey, and David W. Owens. 2014. 'Incubation Temperature  
455 Effects on Hatchling Performance in the Loggerhead Sea Turtle (*Caretta caretta*)'.  
456 Edited by Geir Ottersen. *PLoS ONE* 9 (12): e114880.  
457 <https://doi.org/10.1371/journal.pone.0114880>.
- 458 Fuentes, M.M.P.B., M. Hamann, and C.J. Limpus. 2010. 'Past, Current and Future Thermal  
459 Profiles of Green Turtle Nesting Grounds: Implications from Climate Change'.  
460 *Journal of Experimental Marine Biology and Ecology* 383 (1): 56–64.  
461 <https://doi.org/10.1016/j.jembe.2009.11.003>.
- 462 Fuentes, M.M.P.B., C.J. Limpus, and M. Hamann. 2011. 'Vulnerability of Sea Turtle Nesting  
463 Grounds to Climate Change: VULNERABILITY ASSESSMENT FRAMEWORK'. *Global*  
464 *Change Biology* 17 (1): 140–53. <https://doi.org/10.1111/j.1365-2486.2010.02192.x>.
- 465 Fuller, Wj, Bj Godley, Dj Hodgson, Se Reece, Mj Witt, and Ac Broderick. 2013. 'Importance of  
466 Spatio-Temporal Data for Predicting the Effects of Climate Change on Marine Turtle  
467 Sex Ratios'. *Marine Ecology Progress Series* 488 (August): 267–74.  
468 <https://doi.org/10.3354/meps10419>.
- 469 García, Andrés, Gerardo Ceballos, and Ricardo Adaya. 2003. 'Intensive Beach Management  
470 as an Improved Sea Turtle Conservation Strategy in Mexico'. *Biological Conservation*  
471 111 (2): 253–261.

- 472 Girondot, Marc, and Yakup Kaska. 2014. 'A Model to Predict the Thermal Reaction Norm for  
473 the Embryo Growth Rate from Field Data'. *Journal of Thermal Biology* 45 (October):  
474 96–102. <https://doi.org/10.1016/j.jtherbio.2014.08.005>.
- 475 Godfrey, Matthew H., R Barreto, and N. Mrosovsky. 1996. 'Estimating Past and Present Sex  
476 Ratios of Sea Turtles in Suriname'. *Canadian Journal of Zoology* 74: 267–77.
- 477 Hawkes, La, Ac Broderick, Mh Godfrey, and Bj Godley. 2009. 'Climate Change and Marine  
478 Turtles'. *Endangered Species Research* 7 (June): 137–54.  
479 <https://doi.org/10.3354/esr00198>.
- 480 Hawkes, Lucy A., Annette C. Broderick, Matthew H. Godfrey, Brendan J. Godley, and  
481 Matthew J. Witt. 2013. 'The Impacts of Climate Change on Marine Turtle  
482 Reproductive Success'. In *Coastal Conservation*, edited by Brooke Maslo and Julie L.  
483 Lockwood, 287–310. Cambridge: Cambridge University Press.  
484 <https://doi.org/10.1017/CBO9781139137089.012>.
- 485 Howard, R, I Bell, and D.A. Pike. 2014. 'Thermal Tolerances of Sea Turtle Embryos: Current  
486 Understanding and Future Directions.' *Endangered Species Research* 26: 75–86.  
487 <https://doi.org/10.3354/esr00636>.
- 488 Jensen, M. P., F. A. Abreu-Grobois, J. Frydenberg, and V. Loeschcke. 2006. 'Microsatellites  
489 Provide Insight into Contrasting Mating Patterns in Arribada vs. Non-Arribada Olive  
490 Ridley Sea Turtle Rookeries: MULTIPLE PATERNITY IN OLIVE RIDLEY SEA  
491 TURTLES'. *Molecular Ecology* 15 (9): 2567–75. [https://doi.org/10.1111/j.1365-  
492 294X.2006.02951.x](https://doi.org/10.1111/j.1365-294X.2006.02951.x).
- 493 Liles, Michael J., Tarla Rai Peterson, Jeffrey A. Seminoff, Alexander R. Gaos, Eduardo  
494 Altamirano, Ana V. Henríquez, Velkiss Gadea, et al. 2019. 'Potential Limitations of  
495 Behavioral Plasticity and the Role of Egg Relocation in Climate Mitigation for a  
496 Thermally Sensitive Endangered Species.' *Ecology and Evolution* 9: 1603–22.  
497 [https://doi.org/DOI: 10.1002/ece3.4774](https://doi.org/DOI:10.1002/ece3.4774).
- 498 Mansfield, Katherine L., Milagros L. Mendilaharsu, Nathan F. Putman, Maria A. G. dei  
499 Marcovaldi, Alexander E. Sacco, Gustavo Lopez, Thais Pires, and Yonat Swimmer.  
500 2017. 'First Satellite Tracks of South Atlantic Sea Turtle "Lost Years": Seasonal  
501 Variation in Trans-Equatorial Movement'. *Proceedings of the Royal Society B:  
502 Biological Sciences* 284 (1868). <https://doi.org/10.1098/rspb.2017.1730>.

- 503 Maulany, Risma I., David T. Booth, and Greg S. Baxter. 2012. 'Emergence Success and Sex  
504 Ratio of Natural and Relocated Nests of Olive Ridley Turtles from Alas Purwo  
505 National Park, East Java, Indonesia'. *Copeia* 2012 (4): 738–47.  
506 <https://doi.org/10.1643/CH-12-088>.
- 507 Miller, Jeffrey Dean. 1985. 'Embryology of Marine Turtles'. In *Biology of the Reptilia*,  
508 14:269–328. John Wiley and Sons.
- 509 Mrosovsky, N., and C. Pieau. 1991. 'Transitional Range of Temperature, Pivotal  
510 Temperatures and Thermosensitive Stages for Sex Determination in Reptiles'.  
511 *Amphibia-Reptilia* 12 (2): 169–179.
- 512 Pike, D.A., Antworth, R.L. & Stiner, J.C. (2006). Earlier nesting contributes to shorter nesting  
513 seasons for the loggerhead sea turtle, *Caretta caretta*. *J. Herpetol.* 40, 91–94.  
514
- 515 Plotkin, Pt. 2010. 'Nomadic Behaviour of the Highly Migratory Olive Ridley Sea Turtle  
516 *Lepidochelys olivacea* in the Eastern Tropical Pacific Ocean'. *Endangered Species*  
517 *Research* 13 (1): 33–40. <https://doi.org/10.3354/esr00314>.
- 518 Refsnider, J.M., and F.J. Janzen. 2016. 'Temperature-Dependent Sex Determination under  
519 Rapid Anthropogenic Environmental Change: Evolution at a Turtle's Pace?' *Journal*  
520 *of Heredity* 107: 61–70. <https://doi.org/10.1093/jhered/esv053>.
- 521 Rodríguez-Zárate, Clara J., Axayácatl Rocha-Olivares, and Luciano B. Beheregaray. 2013.  
522 'Genetic Signature of a Recent Metapopulation Bottleneck in the Olive Ridley Turtle  
523 (*Lepidochelys olivacea*) after Intensive Commercial Exploitation in Mexico'.  
524 *Biological Conservation* 168 (December): 10–18.  
525 <https://doi.org/10.1016/j.biocon.2013.09.009>.
- 526 Sandoval Espinoza, Sarahi. 2012. 'Proporción sexual en crías de tortuga *Lepidochelys*  
527 *olivacea* en corrales de incubación del Pacífico Mexicano'. Doctorado, La Paz, Baja  
528 California Sur, Mexico: Instituto Politécnico Nacional - Centro Interdisciplinario de  
529 Ciencias Marinas.
- 530 Sandoval, Sarahi, Victor Gómez-Muñoz, Joaquín Gutiérrez, and Miguel Ángel Porta-Gándara.  
531 2011. 'Metabolic Heat Estimation of the Sea Turtle *Lepidochelys olivacea* Embryos'.  
532 *Journal of Thermal Biology* 36 (2): 138–41.  
533 <https://doi.org/10.1016/j.jtherbio.2010.12.007>.

- 534 Sandoval, Sarahi, Victor M. Gómez-Muñoz, and Miguel Ángel Porta-Gándara. 2017.  
535 'Expansion of the Transitional Range of Temperature for Sea Turtle *Lepidochelys*  
536 *olivacea* from Sex Ratio Data at Controlled Incubation Temperatures'. *Herpetology*  
537 *Notes* 10: 63–65.
- 538 Santidrián Tomillo, Pilar, Luis Fonseca, Frank V. Paladino, James R. Spotila, and Daniel Oro.  
539 2017. 'Are Thermal Barriers" Higher" in Deep Sea Turtle Nests?' *PloS One* 12 (5):  
540 e0177256.
- 541 Tilley, D, S Ball, J Ellick, B. J. Godley, N Weber, S. B. Weber, and A. C. Broderick. 2019. 'No  
542 Evidence of Fine Scale Thermal Adaptation in Green Turtles.' *Journal of Experimental*  
543 *Marine Biology and Ecology* 514–515: 110–17.
- 544 Tripathy, Basudev, and Bivash Pandav. 2007. 'BEACH FIDELITY AND INTERESTING  
545 MOVEMENTS OF OLIVE RIDLEY TURTLES (*LEPIDOCHELYS OLIVACEA*) AT  
546 RUSHIKULYA, INDIA'. *Herpetological Conservation and Biology*, 6.
- 547 Valadez González, Carmen, Francisco de Asis Silva Bátiz, and Salvador Hernández Vázquez.  
548 2000. 'PROPORCIÓN SEXUAL EN CRÍAS DE LA TORTUGA MARINA *Lepidochelys*  
549 *olivacea*, PRODUCIDA EN CORRAL DE INCUBACIÓN EN LA PLAYA DE ANIDACIÓN  
550 LA GLORIA, JALISCO, MÉXICO'. *Boletín del Centro de Investigaciones Biológicas* 34  
551 (3): 305–13.
- 552 Witt MJ, Hawkes LA, Godfrey MH, Godley BJ, Broderick AC (2010) Predicting the impacts of  
553 climate change on a globally distributed species: the case of the loggerhead turtle.  
554 213:901-911
- 555 Wibbels, Thane, David Rostal, and Richard Byles. 1998. 'High Pivotal Temperature in the  
556 Sex Determination of the Olive Ridley Sea Turtle, *Lepidochelys olivacea*, from Playa  
557 Nancite, Costa Rica'. *Copeia* 1998 (4): 1086. <https://doi.org/10.2307/1447364>.
- 558 Weishampel, J. F., Bagley, D. A. and Ehrhart, L. M. (2004). Earlier nesting by loggerhead sea  
559 turtles following sea surface warming. *Glob. Chang. Biol.* 10, 1424-1427.
- 560
- 561 Wright, Lucy I., Wayne J. Fuller, Brendan J. Godley, Andrew McGowan, Tom Tregenza, and  
562 Annette C. Broderick. 2013. 'No Benefits of Polyandry to Female Green Turtles'.  
563 *Behavioral Ecology* 24 (4): 1022–29. <https://doi.org/10.1093/beheco/art003>.

- 564 Wyneken, Jeanette, and Alexandra Lolavar. 2015. 'Loggerhead Sea Turtle Environmental  
565 Sex Determination: Implications of Moisture and Temperature for Climate Change  
566 Based Predictions for Species Survival: ENVIRONMENTAL SEX DETERMINATION IN  
567 LOGGERHEAD TURTLES'. *Journal of Experimental Zoology Part B: Molecular and  
568 Developmental Evolution* 324 (3): 295–314. <https://doi.org/10.1002/jez.b.22620>.
- 569 Wyneken, Jeanette, and Michael Salmon. 1992. 'Frenzy and Postfrenzy Swimming Activity  
570 in Loggerhead, Green, and Leatherback Hatchling Sea Turtles'. *Copeia*, 478–484.
- 571 Zepeda-Borja, Karen M, Christian D Ortega-Ortiz, Ernesto Torres-Orozco, and Aramis  
572 Olivos-Ortiz. 2017. 'Spatial and Temporal Distribution of Sea Turtles Related to Sea  
573 Surface Temperature and Chlorophyll-a in Mexican Central Pacific Waters'. *Revista  
574 de Biología Marina y Oceanografía* 52 (2): 375–85. [https://doi.org/10.4067/S0718-  
575 19572017000200016](https://doi.org/10.4067/S0718-19572017000200016).
- 576

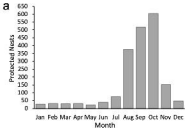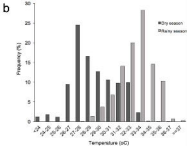

Source: https://www.biorxiv.org/content/10.1101/752071v1.full.pdf
